# Supplementary material
Source: publisher figshare collection journal article supplement (https://tandf.figshare.com/ndownloader/files/33675203)
Supplement: Supplementary file 1 [file 33675203]

## Sheet: Sheet1
Country	National Climate Fund	Established	Source	Host	Scope	Accreditation	Legislation	Source
Algeria	Renewable Energy National Fund	2009	Tax	Ministry of Finance, trust account	Renewable energy		National Fund for Energy Management established in 2000, amended in 2015 by decree	Domestic
Antigua and Barbuda	Sustainable Island Resource Fund	2015	Fees	Department of Environment	Environment, climate mitigation and adaptation	GCF*	Environmental Protection and Management Act 2019	Domestic and External
Armenia	Renewable Resources and Energy Efficiency Fund (R2E2)	2005	Voluntary fees	Independent fund	Renewable energy		RA Government Decision N 799-N	Domestic
Bangladesh	Bangladesh Climate Change Trust Fund	2010	Budget	Ministry of Environment	Climate change		BCCTF Act	Domestic
Bangladesh	Bangladesh Climate Change Resilience Fund	2010	External	Ministry of Environment and Forests	Climate change			External
Benin	National Fund for Environment and Climate (FNEC)	2013	Eco-tax, annual grants, intl donors	Independent fund	Climate and environment	GCF/AF	94-009 law	Domestic and External
Belize	Protected Areas Conservation Trust	1995	Fees, investment income, donations	Independent trust	Natural and cultural resources		Protected Areas Conservation Trust Act of 1995	Domestic and External
Bhutan	Bhutan Trust Fund for Environmental Conservation	1992	Budget	Independent fund	Forests, water, biodiversity	GCF	Royal Charter of the Bhutan Trust Fund for Environmental Conservation-1996	Domestic and External
Brazil	National Fund on Climate Change (Fundo Clima)	2009	Tax, donations	MMA	Climate change		Law 12144 2009	Domestic and External
Brazil	Amazon Fund	2008	Results-based payments, donations	BNDES	Deforestation and forest degradation	GCF	Decree 6, 527 2008	Domestic and External
Brazil	Funbio	2009	Budget and external aid	Independent entity	Biodiversity and climate	GCF		Domestic and External
Burkina Faso	Le Fonds d'Intervention pour l'Environnement (FIE)	2015	Budget and external aid	Ministry of Environment and Ministry of Finance	Climate, environmental degradation, economic development, poverty reduction		Decree No 2015-883/PRES-TRANS/PM/MEF/MERH	Domestic and External
Cambodia	Cambodia Climate Change Alliance Trust Fund	2010	External aid	National Climate Change Committee	Strengthening capacity of Natioanl Climate Change Committee		Cambodia Climate Change Strategic Plan formulated after CCCA was launched	External
Chad	Special Fund for the Environment (Fonds Spécial pour l'Environnement)	2013	Domestic taxes	Ministry of Environment and Fisheries	Protection and enhancement of the environment	GCF	Law N 014/PR/98	Dometic
China	Clean Development Mechanism Fund	2007	Revenue from Certified Emissions Reductions	Ministry of Finance	Low carbon growth and climate resilience	GCF	13th Five Year Plan for Controlling Greenhouse Gas Emissions	Domestic
Cote d'Ivoire	Fonds Interprofessionnel pour la Recherche et le Conseil Agricoles (FIRCA)	2003	Budget and external	Independent entity	Agriculture, climate change	AF	Law No 2001-635, Decree No 2002-520	Domestic and External
Costa Rica	FONAFIFO	1996	Budget, credit sales, capital income	independent legal status	Forest management, agroforestry, environmental services		Forest Law N 7575	Domestic and External
Democratic Republic of Congo	National REDD+ Fund (FONAREDD)	2012	External aid	Multi-Partner Trust Fund Office	REDD+		National REDD+ Strategy	External
Ethiopia	Climate Resilient Green Economy Facility	2012	External aid	Ministry of Finance and Economic Cooperation and MPTF	Climate change	AF/GCF*	CRGE Strategy and Vision	External
Guatemala	National Climate Change Fund (FONCC)	2013	Budget and external aid	Ministry of Environment and Natural Resources	Climate change		N7-2013 - Framework law to regulate vulnerability, adaptation and mitigation	Domestic and External
Guyana	Guyana REDD+ Investment Fund	2010	External aid	Inter-American Development Bank	REDD+			External
India	National Clean Energy and Environment Fund	2010	Budget	Ministry of Finance	Environment		NAF announced as a part of the budget speech in 2014; NCEF through a finance bill 2010-1	Domestic
India	National Adaptation Fund	2015	Budget and External	NABARD for NAF	Clean energy, environment, adaptation	AF/GCF		Domestic and External
Indonesia	Indonesia Climate Change Trust Fund	2009	Budget and external aid	BAPPENAS	Climate change, includes marine		Presidential Regulation 80/2011	Domestic and External
Indonesia	Environment Fund	2019	Budget and external aid	Ministry of Environment and Forests	Environment			Domestic and External
Iran	National Environmental Fund	2015	Budget and external aid	Independent legal entity	Reduce pollution, protect natural resources, biodiversity		Law of the Fourth Five-Year Plan of Development	Domestic and External
Jordan	Jordan Renewable Energy Energy Efficiency Fund	2012	Budget and external aid	Ministry of Energy and Mineral Resources	Depolyment of renewable energy, energy efficiency		Energy Efficiency and Renewable Energy Law N13/2012	Domestic and external
Lao PDR	Environmental Protection Fund	2005	Budget and external aid	Indpendent entity	Environment management, protection and conservation		No. 146/PM	Domestic and external
Maldives	Maldives Climate Change Resilient Fund (Maldives CCTF)	2009	External	World Bank	Climate change strategy and action plan			External
Mexico	Fondo Mexicano para la Conservación de la Naturaleza A.C. (FMCN)	1994	Budget and external	Independent legal entity	Climate adaptation, mitigation	GCF*		Domestic and External
Micronesia	Micronesia Conservation Trust Fund	2002	External and budget	Independent legal entity	Biodiversity conservation and sustainable development	AF/GCF		Domestic and External
Namibia	Environment Investment Fund	2001	Budget	Ministry of Mines and Energy	Sustainable economic development	GCF	EIF: Act 13 of 2001	Domestic and External
Namibia	Revolving Solar Fund	1996	Budget	Ministry of Mines and Energy	Deploy solar to off-grid areas			Domestic
Nepal	National Trust for Nature Conservation	1982	Budget and external	Independent legal entity	Biodiversity, protected areas, climate change	GCF	National Trust for Nature Conservation Act 1982	Domestic and External
Pakistan	National Energy Conservation Centre (ENERCON)	2002	External	Independent corporate body	Energy conservation		National Energy Efficiency and Conservation Act 2016	External and domestic
Peru	Peruvian Trust Fund for National Parks and Protected Areas (PROFONANPE)	1992	External	Independent legal entity	Biodivesity, environmental liabilities, and climate change	AF/GCF*	Decree Law No. 26154	External
Philippines	People's Survival Fund	2012	Budget and external	National Treasury	Climate adaptation, sub-national		Republic Act 10174 of 2012	Domestic and External
Rwanda	FONERWA	2005	Budget and external	Independent legal entity	Environment and climate change		N39/2017 - Law establishing the fund; Minister of Environment establishes eligibility of activities	Domestic and External
Senegal	Centre de Suivi Écologique (CSE)	1986	Budget and external	Indepenent legal entity	Environment, natural resource management, impact assessments	AF/GCF*		Domestic and External
South Africa	South African Green Fund	2012	Budget and external	Department of Environmental Affairs; DBSA	low carbon, climate resilient development	AF/GCF*	National Enviornmental Management Biodiversity Act 10/2004	Domestic and External
South Africa	South Africa National Biodiversity Institute (SANBI)	2004	Budget and external	Independent entity	Biodiversity, climate change			Domestic and external
Thailand	Energy Efficiency Revolving Fund	2003	Budget	Department of Alternative Energy Development and Efficiency	Energy efficiency, renewable energy		Low interest loans from commercial banks	Domestic
Trinidad and Tobago	Green Fund	2013	Markets, fuel taxes, intl aviation levies, and taxing research	Ministry of Planning and Development	Environment		Miscellaneous Taxes Act	Domestic and External
Tuvalu	Tuvalu Trust Fund	1987	Budget and external	Tuvalu Trust Fund	Broad, includes non-climate		International Trust Fund for Tuvalu Agreement	Domestic and External
Tunisia	Energy Transition Fund	2005	Budget	National Energy Conservation Agency	Energy efficiency, co-generation, solar		Law 2005-82 on Energy Efficiency Fund	Domestic
Zambia	Rural Electrification Fund	2003	Budget and external	Rural Energy Authority	Solar, wind, hydro, grid		Rural Electrification Act 2003	Domestic and External
Note:
*indicates that the accredited entity has received funding from the GCF
NA-GCF indicates that the fund is not an accredited entity but is implementing a GCF project
GCFx2 indicates that the fund is implementing two GCF projects
BNDES and Funbio are accredited entities for Brazil.
